# Supplementary material
Source: PubMed Central journal article supplement (PMC7205256)
Supplement: jciinsight-5-133817-s176.pdf [file jciinsight-5-133817-s176.pdf]

## **SUPPLEMENTAL DATA**

Gut-derived uremic toxin handling in vivo requires OAT-mediated tubular secretion in chronic kidney disease

Kevin T. Bush, Prabhleen Singh, and Sanjay K. Nigam

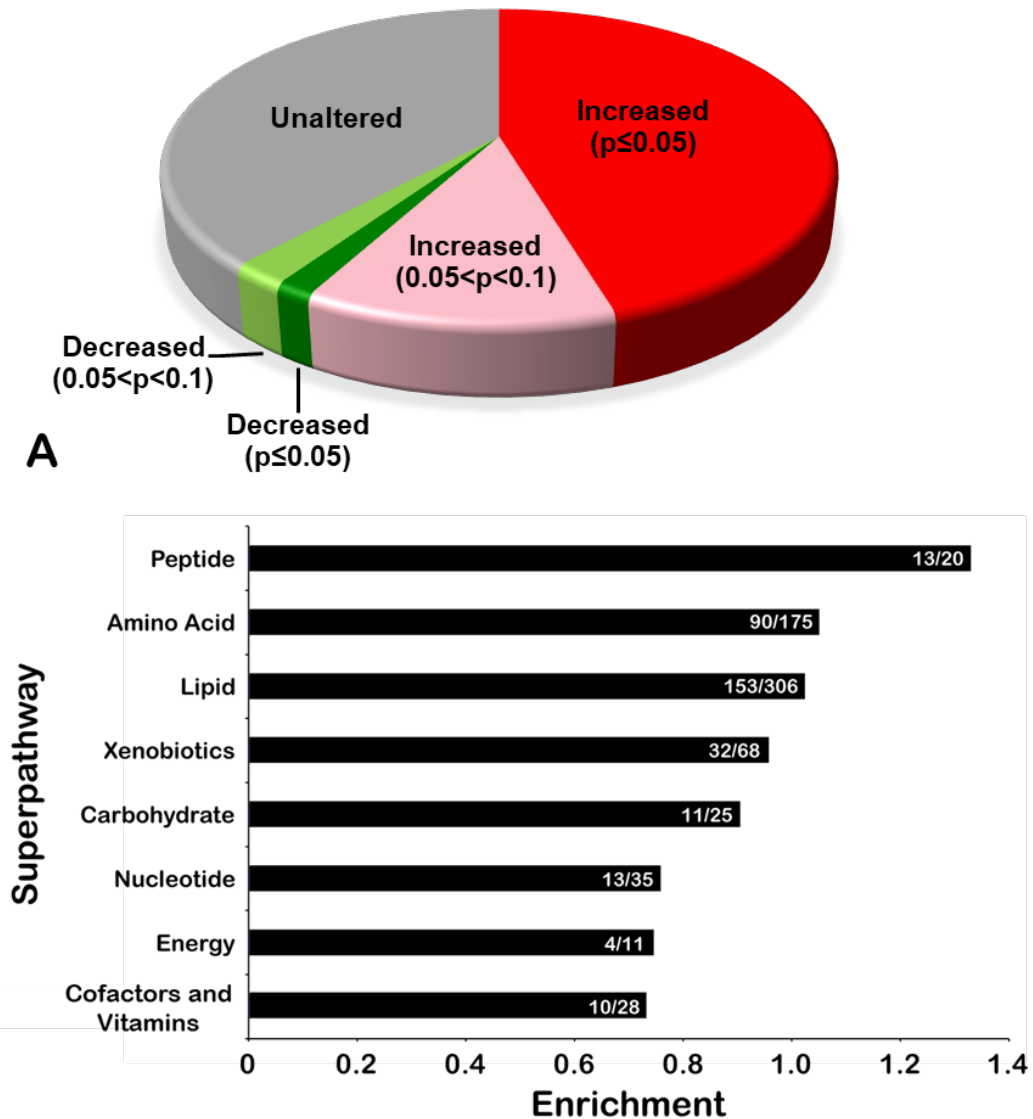

**Supplemental Figure S1. Subtotal nephrectomy (STN) has dramatic effect on systemic metabolism. (A)**

Pie chart showing the effects of STN on the plasma concentrations of the 668 metabolites of known identity on the metabolomics platform. More than half of the 668 metabolites were found to have an increased plasma concentration (dark red and light red wedges) when compared to the sham-operated control animals. The majority of the increased metabolites (~78%) displayed significant ( $p \leq 0.05$ ; dark red) changes in plasma concentration. **(B)** Metabolite enrichment analysis of the altered metabolites in the STN animal revealed their presence in all 8 metabolic superpathway categories described in the analysis. The majority of these metabolites (almost 75%) were found to be components of either the lipid (~47%) or the amino acid (~28%) superpathways.

| Supplemental Table S1                      |                                  |                     |                  |
|--------------------------------------------|----------------------------------|---------------------|------------------|
| Uremic Solutes/Toxins Found in Literature  |                                  |                     |                  |
| Solute                                     | Present on Metabolomics Platform | Increased in Plasma |                  |
|                                            |                                  | STN                 | STN + Probenecid |
| L-Cystine                                  | ✓                                | ✓                   | ✓                |
| N-Formyl-L-methionine                      | ✓                                | ✓                   | ✓                |
| glucuronate                                | ✓                                | ✓                   | ✓                |
| Xanthurenic acid                           | ✓                                | ✓                   | ✓                |
| Hydroxyphenyllactic acid                   | ✓                                | ✓                   | ✓                |
| Isobutyrylglycine                          | ✓                                | ✓                   | ✓                |
| N-acetyl-beta-alanine                      | ✓                                | ✓                   | ✓                |
| N-formylanthranilic acid                   | ✓                                | ✓                   | ✓                |
| gamma-glutamylvaline                       | ✓                                | ✓                   | ✓                |
| Uracil                                     | ✓                                | ✓                   | ✓                |
| Sebacic acid                               | ✓                                | ✓                   | ✓                |
| Isobutyryl-L-carnitine                     | ✓                                | ✓                   | ✓                |
| Thymidine                                  | ✓                                | ✓                   | ✓                |
| Indolelactic acid                          | ✓                                | ✓                   | ✓                |
| 4-Pyridoxic acid                           | ✓                                | ✓                   | ✓                |
| Phenylacetylglycine                        | ✓                                | ✓                   | ✓                |
| L-gamma-glutamyl-L-isoleucine              | ✓                                | ✓                   | ✓                |
| Hydroquinone                               | ✓                                | ✓                   | ✓                |
| 3-hydroxyindolin-2-one sulfate             | ✓                                | ✓                   | ✓                |
| Cytidine                                   | ✓                                |                     | ✓                |
| Thymine                                    | ✓                                |                     | ✓                |
| Ureidopropionic acid                       | ✓                                |                     | ✓                |
| L-Kynurenine                               | ✓                                |                     | ✓                |
| Threonic acid                              | ✓                                |                     | ✓                |
| dodecanedioate                             | ✓                                |                     | ✓                |
| L-Octanoylcarnitine                        | ✓                                |                     | ✓                |
| laurylcarnitine (C12)                      | ✓                                |                     | ✓                |
| thioprolin                                 | ✓                                |                     | ✓                |
| Beta-Alanine                               | ✓                                | ✓                   |                  |
| Indoxyl sulfate                            | ✓                                | ✓                   | ✓                |
| 7-Methylguanine                            | ✓                                | ✓                   | ✓                |
| indole-3-carboxylic acid                   | ✓                                | ✓                   | ✓                |
| Kynurenic acid                             | ✓                                | ✓                   | ✓                |
| 5'-Methylthioadenosine                     | ✓                                | ✓                   | ✓                |
| picolinate                                 | ✓                                | ✓                   | ✓                |
| 4-Acetamidobutanoic acid                   | ✓                                | ✓                   | ✓                |
| Cysteine                                   | ✓                                | ✓                   | ✓                |
| 2-Aminobenzoic acid                        | ✓                                | ✓                   | ✓                |
| cholate                                    | ✓                                | ✓                   | ✓                |
| gamma-glutamylthreonine                    | ✓                                | ✓                   | ✓                |
| gamma-glutamylphenylalanine                | ✓                                | ✓                   | ✓                |
| hexanoylglycine                            | ✓                                | ✓                   | ✓                |
| 3-methyladipate                            | ✓                                | ✓                   | ✓                |
| S-(3-hydroxypropyl)mercapturic acid (HPMA) | ✓                                | ✓                   | ✓                |
| gulonate                                   | ✓                                | ✓                   | ✓                |
| 6-hydroxyindole sulfate                    | ✓                                | ✓                   | ✓                |
| 3-hydroxyadipate                           | ✓                                | ✓                   | ✓                |
| Angiogenin                                 | ✓                                | ✓                   | ✓                |
| Adenine                                    | ✓                                |                     | ✓                |
| Hypotaurine                                | ✓                                |                     | ✓                |
| Putrescine                                 | ✓                                |                     | ✓                |
| Orotic acid                                | ✓                                |                     | ✓                |
| Oxalic acid                                | ✓                                |                     | ✓                |
| N-Acetyl-L-phenylalanine                   | ✓                                |                     | ✓                |
| Ophthalmic acid                            | ✓                                |                     | ✓                |
| N2,N2-Dimethylguanosine                    | ✓                                |                     | ✓                |
| 2-Aminoisobutyric acid                     | ✓                                |                     | ✓                |
| Undecanedioate                             | ✓                                |                     | ✓                |
| N-acetylkynurenine                         | ✓                                |                     | ✓                |
| Glycine                                    | ✓                                | ✓                   |                  |
| Creatinine                                 | ✓                                | ✓                   |                  |
| 3-hydroxy-3-methylglutarate                | ✓                                | ✓                   |                  |
| L-Arabinose                                | ✓                                | ✓                   |                  |
| fructose                                   | ✓                                | ✓                   |                  |
| Gluconic acid                              | ✓                                | ✓                   |                  |
| Allantoin                                  | ✓                                | ✓                   |                  |
| Myoinositol                                | ✓                                | ✓                   |                  |

|                                    |   |   |  |
|------------------------------------|---|---|--|
| N6,N6,N6-Trimethyl-L-lysine        | ✓ | ✓ |  |
| Pantothenic acid                   | ✓ | ✓ |  |
| Salicylic acid                     | ✓ | ✓ |  |
| Citric acid                        | ✓ | ✓ |  |
| N-Acetyl-L-alanine                 | ✓ | ✓ |  |
| N-acetylleucine                    | ✓ | ✓ |  |
| N-Acetyl-L-methionine              | ✓ | ✓ |  |
| N-Acetylvaline                     | ✓ | ✓ |  |
| Urea                               | ✓ | ✓ |  |
| carosine                           | ✓ | ✓ |  |
| Quinolinic acid                    | ✓ | ✓ |  |
| Citrulline                         | ✓ | ✓ |  |
| Dimethylglycine                    | ✓ | ✓ |  |
| Isocitric acid                     | ✓ | ✓ |  |
| argininosuccinate                  | ✓ | ✓ |  |
| 1-Methyladenosine                  | ✓ | ✓ |  |
| 2-Isopropylmalic acid              | ✓ | ✓ |  |
| 3-Methylhistidine                  | ✓ | ✓ |  |
| 4-Guanidinobutanoic acid           | ✓ | ✓ |  |
| 5-hydroxylysine                    | ✓ | ✓ |  |
| Pimelic acid                       | ✓ | ✓ |  |
| imidazole lactate                  | ✓ | ✓ |  |
| N-Acetylglutamic acid              | ✓ | ✓ |  |
| Suberic acid                       | ✓ | ✓ |  |
| Hippuric acid                      | ✓ | ✓ |  |
| Salicyluric acid                   | ✓ | ✓ |  |
| Maleic acid                        | ✓ | ✓ |  |
| Erythritol                         | ✓ | ✓ |  |
| phenyllactate (PLA)                | ✓ | ✓ |  |
| Homocitrulline                     | ✓ | ✓ |  |
| Cysteine-S-sulfate                 | ✓ | ✓ |  |
| N-Acetyl-L-aspartic acid           | ✓ | ✓ |  |
| Indoleacetic acid                  | ✓ | ✓ |  |
| Creatine                           | ✓ | ✓ |  |
| 1-Methylhistidine                  | ✓ | ✓ |  |
| Hydroxyproline                     | ✓ | ✓ |  |
| Methylimidazoleacetic acid         | ✓ | ✓ |  |
| N-Acetylneuraminic acid            | ✓ | ✓ |  |
| Phenol sulphate                    | ✓ | ✓ |  |
| N-Acetylornithine                  | ✓ | ✓ |  |
| allantoic acid                     | ✓ | ✓ |  |
| Pseudouridine                      | ✓ | ✓ |  |
| N-Acetylthreonine                  | ✓ | ✓ |  |
| N-acetylasparagine                 | ✓ | ✓ |  |
| N-acetylglutamine                  | ✓ | ✓ |  |
| N-Acetylhistidine                  | ✓ | ✓ |  |
| N-a-Acetyl-L-arginine              | ✓ | ✓ |  |
| Proline betaine                    | ✓ | ✓ |  |
| N-acetylproline                    | ✓ | ✓ |  |
| Isovalerylglycine                  | ✓ | ✓ |  |
| Alpha-N-Phenylacetyl-L-glutamine   | ✓ | ✓ |  |
| Polyhydroxyproline                 | ✓ | ✓ |  |
| N4-Acetylcytidine                  | ✓ | ✓ |  |
| N6-Carbamoyl-L-threonyl-adenosine  | ✓ | ✓ |  |
| Orotidine                          | ✓ | ✓ |  |
| Pyrocatechol sulfate               | ✓ | ✓ |  |
| 4-Hydroxyhippuric acid             | ✓ | ✓ |  |
| ectoine                            | ✓ | ✓ |  |
| 4-vinylphenol sulfate              | ✓ | ✓ |  |
| 4-Ethylphenyl sulfate              | ✓ | ✓ |  |
| p-Cresol sulfate                   | ✓ | ✓ |  |
| N6-carboxymethyllysine             | ✓ | ✓ |  |
| N2-acetyllysine                    | ✓ | ✓ |  |
| N6-Acetyl-L-lysine                 | ✓ | ✓ |  |
| Asymmetric dimethylarginine        | ✓ | ✓ |  |
| malonylcarnitine                   | ✓ | ✓ |  |
| N-Acetylserine                     | ✓ | ✓ |  |
| Levoinositol                       | ✓ | ✓ |  |
| 2,3-dihydroxyisovalerate           | ✓ | ✓ |  |
| carboxyethyl-GABA                  | ✓ | ✓ |  |
| Trimethylamine N-oxide             | ✓ | ✓ |  |
| N1-Methyl-2-pyridone-5-carboxamide | ✓ | ✓ |  |
| hydantoin-5-propionic acid         | ✓ | ✓ |  |
| 2-Oxindole-3-acetate               | ✓ | ✓ |  |

|                                       |   |   |  |
|---------------------------------------|---|---|--|
| prolylglycine                         | ✓ | ✓ |  |
| Imidazolepropionic acid               | ✓ | ✓ |  |
| Erythronic acid                       | ✓ | ✓ |  |
| 6-oxopiperidine-2-carboxylate         | ✓ | ✓ |  |
| N-Acetyl-1-methylhistidine            | ✓ | ✓ |  |
| N-Acetyl-3-methylhistidine            | ✓ | ✓ |  |
| 2-Aminophenol sulphate                | ✓ | ✓ |  |
| Acetylcarnosine                       | ✓ | ✓ |  |
| formiminoglutamate                    | ✓ | ✓ |  |
| 5-(galactosylhydroxy)-L-lysine        | ✓ | ✓ |  |
| N2,N5-diacetylmithine                 | ✓ | ✓ |  |
| 4-acetylphenol sulfate                | ✓ | ✓ |  |
| Glutaryl carnitine                    | ✓ | ✓ |  |
| O-sulfo-L-tyrosine                    | ✓ | ✓ |  |
| 3-(3-hydroxyphenyl)propionate sulfate | ✓ | ✓ |  |
| guaiacol sulfate                      | ✓ | ✓ |  |
| 4-Methylcatechol sulfate              | ✓ | ✓ |  |
| N-Acetyl-D-glucosamine                | ✓ | ✓ |  |
| N-methylpipecolate                    | ✓ | ✓ |  |
| ferulic acid 4-sulfate                | ✓ | ✓ |  |
| Methylguanidine                       | ✓ | ✓ |  |
| N-acetyltaurine                       | ✓ | ✓ |  |
| arabitol/xylitol                      | ✓ | ✓ |  |
| 1-Methylinosine                       | ✓ | ✓ |  |
| 3-hydroxycinnamate sulfate            | ✓ | ✓ |  |
| N-acetylcitrulline                    | ✓ | ✓ |  |
| 3-hydroxypyridine sulfate             | ✓ | ✓ |  |
| 2-acetamidophenol sulfate             | ✓ | ✓ |  |
| N-acetylhistamine                     | ✓ | ✓ |  |
| 2,8-quinolinediol sulfate             | ✓ | ✓ |  |
| C-glycosyltryptophan                  | ✓ | ✓ |  |
| p-Cresol glucuronide                  | ✓ | ✓ |  |
| Phenol glucuronide                    | ✓ | ✓ |  |
| indoxyl glucuronide                   | ✓ | ✓ |  |
| 4-ethylphenol glucuronide             | ✓ | ✓ |  |
| catechol glucuronide                  | ✓ | ✓ |  |
| caffeic acid sulfate                  | ✓ | ✓ |  |
| 2-Oxoarginine                         | ✓ | ✓ |  |
| Argininic acid                        | ✓ | ✓ |  |
| 2,3-dihydroxy-2-methylbutyrate        | ✓ | ✓ |  |
| (N(1) + N(8))-acetylspermidine        | ✓ | ✓ |  |
| 5,6-dihydrouridine                    | ✓ | ✓ |  |
| 1-ribosyl-imidazoleacetate            | ✓ | ✓ |  |
| N-acetyl-2-aminooctanoate             | ✓ | ✓ |  |
| hydroxyasparagine                     | ✓ | ✓ |  |
| 5-methylthioribose                    | ✓ | ✓ |  |
| N-acetyl-isoptreanine                 | ✓ | ✓ |  |
| Glutaric acid                         | ✓ |   |  |
| Spermidine                            | ✓ |   |  |
| alpha-ketoglutarate                   | ✓ |   |  |
| Cytosine                              | ✓ |   |  |
| Niacinamide                           | ✓ |   |  |
| Uridine                               | ✓ |   |  |
| Galactitol                            | ✓ |   |  |
| Inosine                               | ✓ |   |  |
| Succinic acid                         | ✓ |   |  |
| Pyroglutamic acid                     | ✓ |   |  |
| Methylmalonic acid                    | ✓ |   |  |
| Sucrose                               | ✓ |   |  |
| Uric acid                             | ✓ |   |  |
| Fumaric acid                          | ✓ |   |  |
| 3-methoxytyrosine                     | ✓ |   |  |
| Xanthosine                            | ✓ |   |  |
| carnitine                             | ✓ |   |  |
| Choline                               | ✓ |   |  |
| D-Xylose                              | ✓ |   |  |
| Methylsuccinic acid                   | ✓ |   |  |
| gentisate                             | ✓ |   |  |
| Azelaic acid                          | ✓ |   |  |
| Methionine sulfoxide                  | ✓ |   |  |
| Adipic acid                           | ✓ |   |  |
| 3-hydroxysebacate                     | ✓ |   |  |
| 4-imidazoleacetate                    | ✓ |   |  |
| N-acetyltyrosine                      | ✓ |   |  |

|                                                 |   |  |  |
|-------------------------------------------------|---|--|--|
| 2-Ethylhydracrylic acid                         | ✓ |  |  |
| Propionylcarnitine                              | ✓ |  |  |
| N-acetyltryptophan                              | ✓ |  |  |
| Beta-Guanidinopropionic acid                    | ✓ |  |  |
| Tiglylcarnitine                                 | ✓ |  |  |
| 4-Trimethylammoniobutanoic acid                 | ✓ |  |  |
| Cinnamoylglycine                                | ✓ |  |  |
| 3-Hydroxyhippuric acid                          | ✓ |  |  |
| 2-hydroxydecanoate                              | ✓ |  |  |
| benzoylcarnitine                                | ✓ |  |  |
| Guanidoacetic acid                              | ✓ |  |  |
| 2-Methylbutyroylcarnitine                       | ✓ |  |  |
| N-acetylmethionine sulfoxide                    | ✓ |  |  |
| Sorbitol                                        | ✓ |  |  |
| 2-methylcitrate/homocitrate                     | ✓ |  |  |
| maleonylcarnitine                               | ✓ |  |  |
| ribulonate/xylulonate                           | ✓ |  |  |
| p-Hydroxyphenylacetic acid                      |   |  |  |
| cis-Aconitic acid                               |   |  |  |
| Dimethylamine                                   |   |  |  |
| Deoxyadenosine                                  |   |  |  |
| Homovanillic acid                               |   |  |  |
| Homogentisic acid                               |   |  |  |
| Hypoxanthine                                    |   |  |  |
| Methylamine                                     |   |  |  |
| L-Fucose                                        |   |  |  |
| L-Dopa                                          |   |  |  |
| Alpha-Lactose                                   |   |  |  |
| Phenylacetic acid                               |   |  |  |
| Norepinephrine                                  |   |  |  |
| Phenol                                          |   |  |  |
| Riboflavin                                      |   |  |  |
| Pyrophosphate                                   |   |  |  |
| Vanillylmandelic acid                           |   |  |  |
| Xanthine                                        |   |  |  |
| Citramalic acid                                 |   |  |  |
| 2-Furoylglycine                                 |   |  |  |
| 3-Hydroxyphenylacetic acid                      |   |  |  |
| Vanillic acid                                   |   |  |  |
| 4-Hydroxybenzoic acid                           |   |  |  |
| Arabinonic acid                                 |   |  |  |
| 3-Methylglutaryl carnitine                      |   |  |  |
| 3-Methoxy-4-hydroxyphenylethyleneglycol sulfate |   |  |  |
| DL-Homocystine                                  |   |  |  |
| Citraconic acid                                 |   |  |  |
| Levoglucosan                                    |   |  |  |
| Decanoylcarnitine                               |   |  |  |
| Ortho-Hydroxyphenylacetic acid                  |   |  |  |
| Isovalerylcarnitine                             |   |  |  |
| Malonic acid                                    |   |  |  |
| Methionine                                      |   |  |  |
| Levulinic acid                                  |   |  |  |
| Alpha-Hydroxyisobutyric acid                    |   |  |  |
| Homocysteine                                    |   |  |  |
| 5-Hydroxyindoleacetic acid                      |   |  |  |
| Mannitol                                        |   |  |  |
| Neopterin                                       |   |  |  |
| Trimethylamine                                  |   |  |  |
| S-Adenosylhomocysteine                          |   |  |  |
| Tartaric acid                                   |   |  |  |
| Pyrocatechol                                    |   |  |  |
| trans-Aconitic acid                             |   |  |  |
| Tiglylglycine                                   |   |  |  |
| Pyruvaldehyde                                   |   |  |  |
| Spermine                                        |   |  |  |
| Cyclic GMP                                      |   |  |  |
| Melatonin                                       |   |  |  |
| Thiocyanate                                     |   |  |  |
| 1-Methylguanosine                               |   |  |  |
| Guanidine                                       |   |  |  |
| D-Arabitol/L-Arabitol§                          |   |  |  |
| 5-Hydroxytryptophol                             |   |  |  |
| 1,3-Dimethyluric acid                           |   |  |  |
| p-Cresol                                        |   |  |  |

|                                                    |  |  |  |
|----------------------------------------------------|--|--|--|
| 3-Methylxanthine                                   |  |  |  |
| Gamma-CEHC                                         |  |  |  |
| Phthalic acid                                      |  |  |  |
| 1,3,7-Trimethyluric acid                           |  |  |  |
| 3-Hydroxybenzoic acid                              |  |  |  |
| Androsterone sulfate                               |  |  |  |
| Quinic acid                                        |  |  |  |
| 1-Methyluric acid                                  |  |  |  |
| Benzyl alcohol                                     |  |  |  |
| Guanidinosuccinic acid                             |  |  |  |
| 8-Hydroxy-deoxyguanosine                           |  |  |  |
| Symmetric dimethylarginine                         |  |  |  |
| D-Cysteine                                         |  |  |  |
| L-Gulonolactone                                    |  |  |  |
| Taurocyamine                                       |  |  |  |
| 2-Hydroxyethanesulfonate                           |  |  |  |
| 3-Aminoisobutanoic acid                            |  |  |  |
| Pentosidine                                        |  |  |  |
| N6-Methyladenosine                                 |  |  |  |
| D-Threitol                                         |  |  |  |
| N1-Methyl-4-pyridone-3-carboxamide                 |  |  |  |
| 4-Hydroxynonenal                                   |  |  |  |
| 5-Acetylamino-6-amino-3-methyluracil               |  |  |  |
| 2,5-Furandicarboxylic acid                         |  |  |  |
| Hexanal                                            |  |  |  |
| Scyllitol                                          |  |  |  |
| Malondialdehyde                                    |  |  |  |
| 6-Sialyl-N-acetyllactosamine                       |  |  |  |
| Indoxyl glucuronide                                |  |  |  |
| 1,7-Dimethyluric acid                              |  |  |  |
| 7-Methyluric acid                                  |  |  |  |
| Decanal                                            |  |  |  |
| L-3-Hydroxykynurenine                              |  |  |  |
| Homovanillic acid sulfate                          |  |  |  |
| Ethylamine                                         |  |  |  |
| Indoleacetyl glutamine                             |  |  |  |
| Saccharin                                          |  |  |  |
| Indole-3-methyl acetate                            |  |  |  |
| 2-Octenal                                          |  |  |  |
| 2-Nonenal                                          |  |  |  |
| Heptanal                                           |  |  |  |
| 2-Hexenal                                          |  |  |  |
| 2-Heptenal                                         |  |  |  |
| 1-[(5-Amino-5-carboxypentyl)amino]-1-deoxyfructose |  |  |  |
| 4-Decenal                                          |  |  |  |
| Acrolein                                           |  |  |  |
| 5-Hydroxyindole                                    |  |  |  |
| Nonanal                                            |  |  |  |
| L-Xylonate                                         |  |  |  |
| 3-Carboxy-4-methyl-5-propyl-2-furanpropionic acid  |  |  |  |
| 21-Hydroxypregnenolone disulfate                   |  |  |  |
| 2-Hydroxyacetaminophen sulfate                     |  |  |  |
| 2-Methoxyphenol sulfate                            |  |  |  |
| 2-Methoxyresorcinol                                |  |  |  |
| 3-[3-(sulfooxy)phenyl]propanoic acid               |  |  |  |
| 3-Deoxyglucosone                                   |  |  |  |
| 3-Methylcatechol sulfate                           |  |  |  |
| 4-HO-decenal                                       |  |  |  |
| 4-HO-hexenal                                       |  |  |  |
| 4-HO-Nonenal                                       |  |  |  |
| 4-HO-octenal                                       |  |  |  |
| 4-Pyridone-3-carboxamide-1-β-d-ribose              |  |  |  |
| 4-Vinylphenol sulfate                              |  |  |  |
| Acisoga                                            |  |  |  |
| Alpha-CEHC glucuronide                             |  |  |  |
| C-mannosyltryptophan                               |  |  |  |
| Gamma-CEHC glucuronide                             |  |  |  |
| Glyoxal                                            |  |  |  |
| Hydroquinone sulfate                               |  |  |  |
| Indican                                            |  |  |  |
| Insulin-like growth factor 1                       |  |  |  |
| Interleukin-10                                     |  |  |  |
| Leptin                                             |  |  |  |
| Methionine-enkephalin                              |  |  |  |

|                                                                                                                                                                      |  |  |  |
|----------------------------------------------------------------------------------------------------------------------------------------------------------------------|--|--|--|
| N-acetyl alliin                                                                                                                                                      |  |  |  |
| N $\xi$ -(carboxymethyl)lysine                                                                                                                                       |  |  |  |
| Osteocalcin                                                                                                                                                          |  |  |  |
| Oxamate                                                                                                                                                              |  |  |  |
| Phenylcarnitine                                                                                                                                                      |  |  |  |
| Pyroglutamine                                                                                                                                                        |  |  |  |
| Pyroglutamylvaline                                                                                                                                                   |  |  |  |
| Retinol Binding Protein                                                                                                                                              |  |  |  |
| Salicylic glucuronide                                                                                                                                                |  |  |  |
| Vascular endothelial growth factor                                                                                                                                   |  |  |  |
| $\alpha$ 1-Acid glycoprotein                                                                                                                                         |  |  |  |
| $\beta$ -Lipotropin                                                                                                                                                  |  |  |  |
| PMID: 14615964, 17015248, 18698804, 18854818, 19234110, 20218618, 20870466, 21784895, 22300547, 22961385, 23614584, 26317986, 27701177, 28379433, 28396122, 30087103 |  |  |  |

**Supplemental Table S1.** List of uremic solutes compiled from literature search (reference PMIDs are shown in the final row of the table). A check mark in Column 2 indicates that uremic solute is found on the Metabolon platform used in the study. A check mark in Column 3 indicates that this uremic toxin accumulated in the plasma of the STN animal, while a check mark in Column 4 indicates plasma accumulation in the STN animal treated with probenecid. The absence of a check mark indicates that no significant accumulation was detected for that metabolite.
